# Supplementary material for: Altered Intestinal Morphology and Microbiota Composition in the Autism Spectrum Disorders Associated SHANK3 Mouse Model
Source: PubMed Central journal article supplement (PMC6540607; doi:10.3390/ijms20092134), 2019-04-30
Supplement: ijms-20-02134-s001.pdf [file ijms-20-02134-s001.pdf]

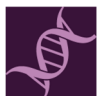

Article

# Altered intestinal morphology and microbiota composition in the Autism Spectrum Disorders associated SHANK3 mouse model

Ann Katrin Sauer, Juergen Bockmann, Konrad Steinestel, Tobias M. Boeckers and Andreas M. Grabrucker

Figure Supplements: Figure S1

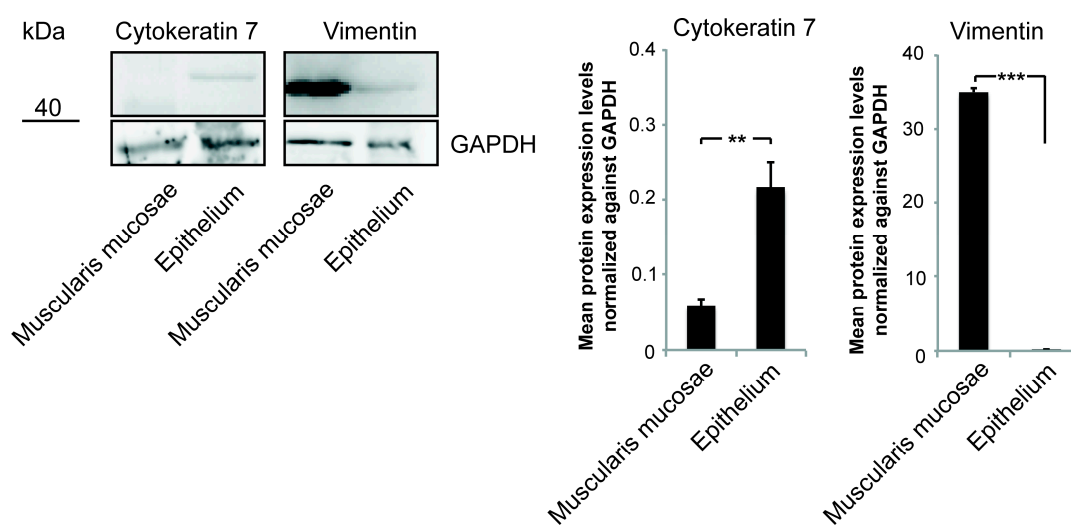

**Figure supplement 1.** Purification and analysis of GI epithelium of wildtype and *Shank3 $\alpha\beta$*  KO mice. Western Blot analysis for the expression of Vimentin, and Cytokeratin 7 shows that epithelium can be successfully separated from gut muscle (t-test, *Cytokeratin7*:  $p < 0.01$ ; *Vimentin*:  $p < 0.001$  ( $n = 3$  western blot bands were analyzed from 3 animals)). \*\*  $p < 0.01$ ; \*\*\*  $p < 0.001$

Figure Supplements: Figure S2

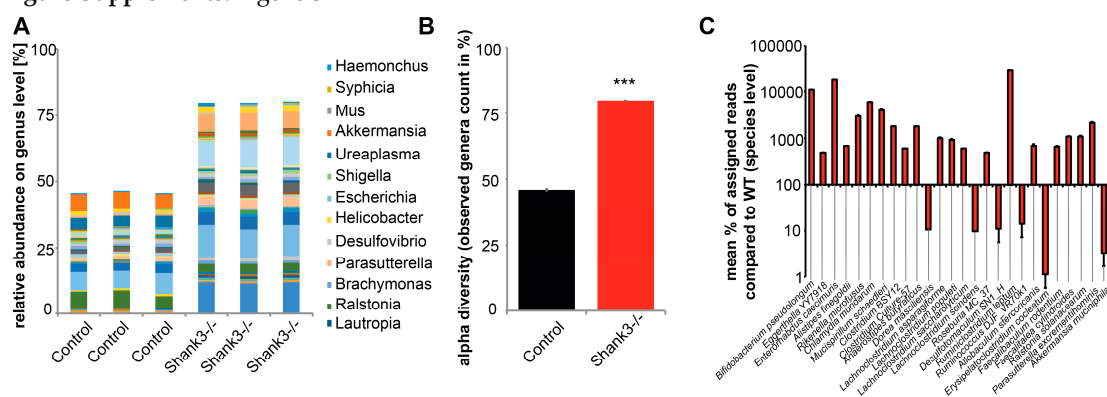

**Figure supplement 2. (A)** Bar plot graph comparing Control and *Shank3 $\alpha\beta$*  KO mice on genus level. Within group sample differences were small compared to between group differences. **(B)** Measurement of alpha diversity reveals a significant difference between Controls and *Shank3 $\alpha\beta$*  KO mice (*t*-test,  $p < 0.0001$ ). **(C)** Identification of species by 16S rRNA sequencing can only be done with low confidence. Species with more than 5 fold increase or decrease in *Shank3 $\alpha\beta$*  KO mice compared to Control are shown. Among those highly upregulated are: *Bifidobacterium pseudolongum*, *Eggerthella* YY7918, *Enterorhabdus caecimuris*, *Alistipes finegoldii*, *Rikenella microfusus*, *Chlamydia muridarum*, *Mucispirillum schaedleri*, *Clostridium* BSY12, *Clostridium* Culture-57, *Anaerostipes butyraticus*, *Lachnospirillum asparagiforme*, *Lachnospirillum populeti*, *Lachnospirillum saccharolyticum*, *Roseburia* MC\_37, *Ruminiclostridium leptum*, *Allobaculum stercoricanis*, *Faecalibaculum rodentium*, *Faecalitalea cylindroides*, *Ralstonia solanacearum*, *Parasutterella excrementihominis*. Species significantly downregulated include: *Dorea massiliensis*, *Lachnospirillum scindens*, *Desulfotomaculum* SN1\_H, *Ruminococcus* DJF\_VR70k1, *Erysipelatoclostridium cocleatum*, *Akkermansia muciniphila*. \*\*\*  $p < 0.001$
